# 1 Calibrated prediction intervals for polygenic scores across 2 diverse contexts

3  
4 Kangcheng Hou<sup>1</sup>, Ziqi Xu<sup>2</sup>, Yi Ding<sup>1</sup>, Arbel Harpak<sup>3,4</sup>, Bogdan Pasaniuc<sup>1,5,6,7</sup>

5  
6 <sup>1</sup> Bioinformatics Interdepartmental Program, University of California, Los Angeles, Los Angeles, CA, USA

7 <sup>2</sup> Department of Computer Science, University of California, Los Angeles, Los Angeles, CA, USA

8 <sup>3</sup> Department of Population Health, The University of Texas at Austin, Austin, TX, USA

9 <sup>4</sup> Department of Integrative Biology, The University of Texas at Austin, Austin, TX, USA

10 <sup>5</sup> Department of Pathology and Laboratory Medicine, David Geffen School of Medicine, University of  
11 California, Los Angeles, Los Angeles, CA, USA

12 <sup>6</sup> Department of Computational Medicine, David Geffen School of Medicine, University of California, Los  
13 Angeles, Los Angeles, CA, USA

14 <sup>7</sup> Institute for Precision Health, University of California, Los Angeles, Los Angeles

15 To whom correspondence should be addressed: [houkc@ucla.edu](mailto:houkc@ucla.edu), [pasaniuc@ucla.edu](mailto:pasaniuc@ucla.edu)

## 16 Abstract

17 Polygenic scores (PGS) have emerged as the tool of choice for genomic prediction in a wide  
18 range of fields from agriculture to personalized medicine. We analyze data from two large  
19 biobanks in the US (All of Us) and the UK (UK Biobank) to find widespread variability in PGS  
20 performance across contexts. Many contexts, including age, sex, and income, impact PGS  
21 accuracies with similar magnitudes as genetic ancestry. PGSs trained in single versus multi-  
22 ancestry cohorts show similar context-specificity in their accuracies. We introduce trait prediction  
23 intervals that are allowed to vary across contexts as a principled approach to account for context-  
24 specific PGS accuracy in genomic prediction. We model the impact of all contexts in a joint  
25 framework to enable PGS-based trait predictions that are well-calibrated (contain the trait value  
26 with 90% probability in all contexts), whereas methods that ignore context are mis-calibrated. We  
27 show that prediction intervals need to be adjusted for all considered traits ranging from 10% for  
28 diastolic blood pressure to 80% for waist circumference. Adjustment of prediction intervals  
29 depends on the dataset; for example, prediction intervals for education years need to be adjusted  
30 by 90% in All of Us versus 8% in UK Biobank. Our results provide a path forward towards  
31 utilization of PGS as a prediction tool across all individuals regardless of their contexts while  
32 highlighting the importance of comprehensive profile of context information in study design and  
33 data collection.

## 34 Introduction

35 Accurate prediction of complex diseases/traits integrating genetic and non-genetic factors is  
36 essential for a wide range of fields from agriculture to personalized genomic medicine. The  
37 genetic contribution to common traits is typically predicted using polygenic scores (PGS) that  
38 summarize the joint contribution of many genetic factors<sup>1-4</sup>. A critical barrier in PGS use is their  
39 *context-specific accuracy* – their performance (and/or bias) varies across genetic ancestry<sup>5-9</sup>, age,  
40 sex, socioeconomic status and other factors<sup>10-12</sup>. This prevents equitable use of PGS across  
41 individuals of all contexts<sup>4,5,13</sup>.

42 PGS use data from large-scale genome-wide association studies (GWAS) to estimate linear  
43 prediction models of traits based on genetic variants; these prediction models are then used for  
44 new data that often has different context characteristics from the GWAS training data (e.g.,  
45 different distributions of genetic ancestry, social determinants of health, etc.)<sup>1,2,14</sup>. Even when  
46 testing data is similar to training data, genetic effects themselves can vary by contexts (e.g., due  
47 to genotype-environment interaction, across age<sup>15</sup>, sex<sup>16</sup>, genetic ancestry<sup>17–20</sup>) thus leading to  
48 differential PGS performance (as traditional PGS do not model such interactions). Furthermore,  
49 when genetic effects are unknown, allele frequency, linkage disequilibrium and differential tagging  
50 of true latent genetic factors can also lead to context-specific accuracy of PGS-based  
51 predictions<sup>10,15,21</sup>.

52 To account for PGS accuracy variability, we propose an approach to incorporate context-  
53 specificity into *trait prediction intervals* that are allowed to vary across contexts. Trait prediction  
54 intervals denote the range containing true trait values with pre-specified confidence (e.g., 90%).  
55 And they provide a natural approach to model variability in PGS accuracies – narrower prediction  
56 intervals correspond to contexts where PGS attains higher accuracy – that can then be used in  
57 applications of PGS-based trait predictions<sup>10,22,23</sup>. As an example, consider the case of two  
58 individuals with the same PGS-based predictions for low-density lipoprotein cholesterol (LDL) of  
59 120 mg/dL. If the two individuals have different contexts (e.g., sex) that are known to impact PGS  
60 accuracy (e.g.,  $R^2=0.1$  in men vs.  $0.2$  in women), their prediction intervals will also vary (e.g.,  $120$   
61  $\pm 40$  mg/dL vs.  $120 \pm 10$  mg/dL). In this example the second individual is more likely to meet a  
62 decision criterion of  $LDL > 100$  mg/dL for clinical intervention.

63 To achieve calibration across all contexts, we propose a statistical model (*CalPred*) that jointly  
64 models the effects of all contexts on PGS accuracy leveraging calibration data. The key  
65 assumption is that new target individuals for whom PGS-based predictions will be employed have  
66 similar contexts as the calibration data. This is motivated by precision health efforts that created  
67 EHR-linked biobanks of patients from the same medical system in which the PGS-based  
68 prediction will be applied in the future<sup>24–27</sup>; in this context the assumption is that the biobank is  
69 representative of future patients entering the same medical system.

70 First, we analyze data across two large-scale biobanks (UK Biobank<sup>28</sup> and All of Us<sup>29</sup>) to find  
71 pervasive impact of context on PGS accuracy across a wide range of traits. All considered traits  
72 ( $N=72$ ) have at least one context impacting their accuracies<sup>10,12</sup>. Socio-economic contexts have  
73 similar magnitudes of impact on PGS accuracies as genetic ancestry; for example, PGS accuracy  
74 varies by up to ~50% for individuals across the context of “education years” averaged across all  
75 considered traits in All of Us. Moreover, socio-economic contexts have greater impact on PGS  
76 accuracy in All of Us, a more diverse dataset, as compared to UK Biobank.

77 Second, we use simulations and real data analysis to find that CalPred provides well-calibrated  
78 prediction intervals across individuals of diverse contexts. For example, CalPred jointly models  
79 the impact of genetic ancestry, age and sex and other social determinants of health on LDL  
80 prediction to find that prediction intervals need adjustment by up to ~40% across contexts to  
81 achieve calibration. The context-specificity of PGS prediction varies across traits, with largest  
82 adjustments observed for traits including waist circumference and average mean spherical

83 equivalent (avMSE) where prediction intervals need adjustment by ~100% for individuals in  
84 certain contexts; meanwhile certain traits such as diastolic blood pressure only need a modest  
85 adjustment by ~20%. Notably, the context-specificity of the same trait also depends on the studied  
86 population; for example, prediction intervals for education years need adjustment by 90% in All of  
87 Us versus 8% in UK Biobank, reflecting the more diverse distribution of education years and other  
88 social determinants of health in All of Us. Overall, our approaches provide a path forward to  
89 modeling differential PGS accuracy by context in prediction of complex traits in humans.

## 90 Results

### 91 Overview

92 We incorporate context-specific accuracy in PGS-based predictions using prediction intervals that  
93 are allowed to vary across contexts to maintain calibration: the true phenotype is contained within  
94 the prediction interval at a pre-specified probability (e.g., 90%; Figure 1a). Naturally, as accuracy  
95 varies by context, the interval width needs to vary adaptively such that calibration is maintained  
96 (Figure 1b). For illustrative purpose we distinguish among three types of prediction intervals  
97 (Figure 2). First, standard errors of PGS weights can be used to estimate prediction intervals that  
98 do not vary across contexts and/or individuals; these types of intervals are calibrated only when  
99 target perfectly matches training which is hard to achieve in practice. Second, prediction intervals  
100 can be estimated empirically using a calibration dataset across all data ignoring context<sup>1,30-34</sup>;  
101 these types of intervals are robust to mismatches between training and testing, but are mis-  
102 calibrated in particular contexts due to the variability of PGS accuracy. Third, prediction intervals  
103 that vary across contexts can be estimated using a calibration dataset by empirically quantifying  
104 the impact of each context on prediction accuracy; context-specific prediction intervals are  
105 adaptive and robust across contexts albeit at the expense of a more complex statistical model  
106 and larger calibration data that spans all contexts. Motivated by clinical implementation of PGS-  
107 based predictions in medical systems where EHR-linked biobanks already exist, here we focus  
108 on leveraging calibration data to estimate context-specific prediction intervals. In this scenario it  
109 is natural to use existing EHR-linked biobanks as approximation for future patients within the  
110 same medical system. For example, UCLA ATLAS biobank<sup>24</sup> contains data of ~150k patients  
111 within the UCLA Health system that can be used to calibrate PGS-based predictors for future  
112 visits of UCLA patients.

113 Mathematically, we model context-specific prediction accuracy via the error term  $\mathbb{E}[(y_i - \hat{y}_i)^2 | \mathbf{c}_i]$   
114 for phenotype  $y_i$  and prediction mean (or point prediction)  $\hat{y}_i = \mathbb{E}[y_i | \mathbf{c}_i]$  as a function of context  $\mathbf{c}_i$   
115 for each individual  $i$  in the calibration dataset. We parametrize the impact of all contexts on  
116 prediction intervals in a joint model as  $\mathbb{E}[(y_i - \hat{y}_i)^2 | \mathbf{c}_i] = \exp(\mathbf{c}_i^\top \boldsymbol{\beta}_\sigma)$  where  $\mathbf{c}_i$  denotes contexts  
117 including age, sex, socioeconomic factors and top principal components (denoting major axes of  
118 genetic ancestry; Methods).  $\boldsymbol{\beta}_\sigma$  quantifies the unique impact of each context on variation of the  
119 prediction interval accounting for other contexts (Methods). This approach is a generalization of  
120 the context-free approach. Denoting prediction standard deviation (SD) as  $\hat{\sigma}_i = \sqrt{\exp(\mathbf{c}_i^\top \hat{\boldsymbol{\beta}}_\sigma)}$ , 90%  
121 prediction intervals can be derived as  $(\hat{y}_i - 1.645 \times \hat{\sigma}_i, \hat{y}_i + 1.645 \times \hat{\sigma}_i)$ .

## 122 Widespread context-specific PGS accuracy in diverse populations

123 Although PGS accuracy has been shown to vary across selected traits and contexts<sup>5,10–12</sup>, its  
124 pervasiveness remains unclear. We analyzed two large-scale biobanks in the UK and US (UK  
125 Biobank and All of Us) comprising >600K individuals spanning a wide range of contexts. We  
126 trained PGS for 72 traits in individuals previously annotated as “White British”<sup>28</sup> (WB) from UK  
127 Biobank and evaluated these PGSs in independent testing data from UK Biobank and All of Us.  
128 We focused on 11 contexts that span genetic ancestry, sex, age, and socio-economic factors  
129 such as educational attainment (Methods). We used *relative*  $\Delta R^2$  to quantify the impact of context  
130 to PGS accuracy defined as  $\frac{R^2_{\text{top quintile}} - R^2_{\text{bottom quintile}}}{R^2_{\text{all}}}$ , where  $R^2_{[\text{subset}]}$  denotes  $R^2$  between PGS  
131 and residual phenotype computed in a given range of the context variable (top/bottom quintile for  
132 continuous contexts; binary subgroups for binary contexts). We found widespread context-  
133 specific PGS accuracies across all traits and contexts studied (Figure 3, S1 and S2, Table S1 and  
134 S2; Methods).

## 135 Context-specific accuracy in UK Biobank

136 All 72 traits had at least one context impacting their accuracies in UK Biobank data; 264 (out of  
137 792) PGS-context pairs had significant variable accuracy ( $p < 0.05 / (72 \times 11)$ ; Methods). Overall,  
138 genetic ancestry had the most widespread impact on PGS accuracy: 70 of 72 traits had significant  
139 differences in PGS accuracy, with an average relative  $\Delta R^2$  of -46% between top and bottom PC1  
140 quintiles (Figure S3). Socioeconomic contexts also significantly impacted PGS accuracy; PGS  
141 accuracy significantly differed for 62 traits, with an average relative  $\Delta R^2$  of -23% between top and  
142 bottom deprivation index quintiles. The direction of context’s impact depended on the trait being  
143 studied. For example, age significantly impacted 19 traits; rather than consistently increasing or  
144 decreasing accuracy, an older age led to increased accuracies for 13 traits (e.g., high-density  
145 lipoprotein cholesterol and white blood cell count in Figure 3; HDL and WBC) and to decreased  
146 accuracies for 6 traits (e.g., low-density lipoprotein cholesterol; LDL).

147 The widespread context-specificity retained even when testing data was matched to the training  
148 data by genetic ancestry (Figure 3). 22 (out of 72) PGSs had at least one context significantly  
149 impacting their prediction accuracies; 43 PGS-context pairs had significant variable accuracy ( $p$   
150  $< 0.05 / (72 \times 11)$ ). We replicated previously reported variable PGS accuracy in WB individuals  
151 for diastolic blood pressure, body mass index, education years across contexts of sex, age and  
152 deprivation index<sup>10</sup>. As an example, LDL was significantly impacted by six contexts in WB  
153 individuals, with age having the strongest impact (relative  $\Delta R^2$  was more than 100% between top  
154 and bottom age quintiles).

155 Next, we studied the unique impact of each context on variable PGS accuracy within CalPred  
156 model that jointly accounts for all contexts (Methods, Figure 3cd). Context contribution to variable  
157 accuracy conditional on all other contexts was quantified with  $\beta_\sigma$ , where larger absolute  $\beta_\sigma$   
158 indicated more substantial variation in accuracy along a context variable (Methods). In general,  
159 the effects of contexts to traits were largely independent. For example, both PC1 and deprivation  
160 index significantly impacted PGS accuracy for a range of traits in the joint model, indicating both

161 had a unique contribution to variable PGS accuracy. We also found examples showing otherwise:  
162 the impact of “wear glasses” context on LDL accuracy can be explained by its correlation with age  
163 (Figure S4), while other contexts independently contributed to variable LDL accuracy. These  
164 results indicated the importance of jointly considering all measured contexts to correctly assess  
165 the unique contribution of each context. We found that contexts including sex, age, income, and  
166 deprivation index had comparable impact on accuracy as genetic ancestry (Figure 3ef). The  
167 distribution of estimated effects of  $\beta_\sigma$  suggested predominantly higher prediction accuracy for  
168 individuals with higher income and lower deprivation indices; this can be partly explained by  
169 different context distribution PGS training data: WB individuals had higher income and lower  
170 deprivation indices compared to the rest of the UK Biobank<sup>35</sup> (Figure S5).

### 171 **Context-specific accuracy in All of Us**

172 We next turned to All of Us, a diverse biobank across the US comprising more than 160K  
173 participants (Figure S3 and S6). Due to challenges in phenotype matching across biobanks, we  
174 restricted the analysis to 10 traits and 11 contexts matching the UK Biobank analyses (Methods).  
175 All traits had at least one context that impacted their accuracies (Figure 4, Table S3 and S4). 81  
176 PGS-context pairs were significant when considering all individuals, and 49 PGS-context pairs  
177 were significant when restricting to individuals with self-reported race/ethnicity (SIRE) as “White”  
178 (“White SIRE”) ( $p < 0.05 / (12 \times 11)$ ; Methods). Prediction of cholesterol and LDL were similarly  
179 impacted by a broad range of contexts. Prediction of education years was impacted by contexts  
180 including age, BMI, employment, income, both when considering all individuals and considering  
181 “White SIRE” sample, consistent with evidence that socioeconomic contexts influence PGS of  
182 socio-behavioral traits such as education<sup>10,36,37</sup>.

183 Interestingly, socioeconomic contexts had greater impact on context-specificity in All of Us as  
184 compared to UK Biobank. For example, years of education context significantly impacted 9 out of  
185 11 traits with average relative  $\Delta R^2=50\%$ , as compared to 2 out of 71 traits with average relative  
186  $\Delta R^2=0.2\%$  in UK Biobank (averaging across traits other than education years itself). This may be  
187 explained by larger variation of education years in the US and/or education being more correlated  
188 with latent social determinants of health in the US as compared to the UK.

189 For completeness we also evaluated PGSs for height<sup>38</sup> and LDL<sup>39</sup> derived from multi-ancestry  
190 meta-analyses from PGS Catalog<sup>40</sup> (Figure 4). We found that multi-ancestry PGSs did not  
191 alleviate widespread context-specific accuracy. Higher income, education years, better  
192 employment, or lower BMI predominately led to higher prediction accuracy across traits (Figure  
193 4ef). We formally compared and determined an overall consistency for fitted  $\beta_\sigma$  coefficients  
194 across populations and biobanks (Figure S7). We determined that variable  $R^2$  across contexts  
195 was not solely driven by differences of phenotype variance in context strata: context-specific  $R^2$   
196 can result from differences in either phenotypic variance or PGS predictiveness, and the extent  
197 attributed to either component varied by each context-trait pair (Figure S8).

### 198 **CalPred yields calibrated context-specific prediction in simulations**

199 Having shown that context-specificity of PGS accuracy is pervasive across traits and biobanks,  
200 we next turned to CalPred, an approach to estimate context-specific prediction intervals  
201 accounting for context- and trait-specific variable accuracy (Methods). We first evaluated CalPred  
202 in simulations where prediction accuracy varies across contexts similar to real data<sup>5,6,10</sup> (Figure 5;  
203 Methods). We assessed calibration of prediction intervals at both the overall level and within each  
204 context subgroup (Methods). First, we showed that generic prediction intervals without context-  
205 specific adjustment had severe over-/under-coverage when evaluated within each context  
206 subgroup stratified by PC1, age, or sex. As expected, biases of coverage tracked closely with  
207 accuracy across contexts (Figure 5). Second, we showed that CalPred context-specific prediction  
208 intervals that were allowed to vary with each individual's context were calibrated across contexts  
209 (Figure 5). This was due to the incorporation of context-specific prediction accuracy in the interval  
210 estimation. CalPred performance depended on calibration sample size with  $N_{\text{cal}} > 500$  for accurate  
211 model fitting (Figure S9). Next, we investigated the impact of unmeasured context and found that  
212 CalPred was not calibrated across subgroups of individuals defined by the unmeasured context.  
213 In simulations where we included excessive contexts that did not impact prediction accuracy,  
214 coverages of prediction intervals were associated with larger standard errors, highlighting the  
215 importance of selecting an appropriate set of contexts in calibration (Figure S9). We also  
216 determined that parameter estimations of  $\beta_{\sigma}$  were accurate when the model was correctly  
217 specified and remained robust in model mis-specification scenarios (Figure S10). Overall,  
218 simulation results demonstrated that CalPred is able to produce well-calibrated and context-  
219 specific prediction intervals when contexts are measured and present in the data, and highlighted  
220 the importance of comprehensive profiling of relevant context information.

## 221 **CalPred yields calibrated context-specific predictions in real data**

222 Next we applied CalPred to produce context-specific prediction intervals for a wide range of traits  
223 across UK Biobank and All of Us. We start by showcasing LDL, an important risk factor of  
224 cardiovascular disease<sup>39</sup>. Calibration by context is particularly important because accuracy of  
225 predicting LDL was impacted by many contexts, with largest impact from age (Figure 3 and 4).  
226 We modeled the prediction mean using PGS together with age, sex, and genetic ancestry, and  
227 modeled context-specific prediction intervals using the set of contexts investigated in Figure 3  
228 and 4 (Methods). Accuracy of LDL prediction decreased with age ( $R^2=17\%$  in youngest quintile  
229 vs.  $R^2=11\%$  in oldest quintile; Figure 6a). Generic prediction intervals were mis-calibrated with  
230 coverage of 93% and 86% for youngest and oldest quintiles instead of the nominal level of 90%.  
231 In contrast, context-specific prediction intervals had the expected 90% coverage across all  
232 considered contexts. This resulted from varying prediction interval length by context, with a wider  
233 interval compensating for lower prediction accuracy. For example, as the model estimated a  
234 positive impact of age to prediction uncertainty ( $\beta_{\sigma}=0.15$ ;  $p < 10^{-30}$ ), individuals in youngest/oldest  
235 age quintiles had average prediction standard deviation (SD) of 27.9 vs. 34.5 mg/dL (24%  
236 difference; Figure S11; Methods). These findings were replicated in All of Us and in other traits  
237 (Figure S12 and S13), where  $R^2$  varied across contexts and context-specific prediction intervals  
238 achieved well-calibration.

239 Next, we sought to examine the joint contribution of all considered contexts to variable prediction  
240 SD (instead of separately considering age, PC1 or sex; Figure 6b). Context-specific accuracy was

241 more pronounced by ranking individuals by prediction SD accounting for impact of all contexts  
242 (prediction SD ranged approximately from 20 mg/dL to 45mg/dL; Figure 6b): we detected a 39%  
243 difference comparing individuals in bottom and top deciles of prediction SD (26.0 mg/dL vs. 36.3  
244 mg/dL; Figure 6c; Figure S14 and S15). This implied that individuals in top prediction SD decile  
245 (characterized by contexts of male, increased PC1 and age; see LDL column in Figure 4c) needs  
246 to have their prediction interval widths increased by 39% compared to those in bottom decile.

247 Extending analysis accounting for all contexts to all traits in UK Biobank and All of Us, we  
248 determined a widespread large variation of context-specific prediction intervals across traits  
249 (Figure 7). Average differences between top and bottom prediction SD deciles across traits were  
250 31% and 43%, respectively for UK Biobank and All of Us. The trait with the highest prediction SD  
251 difference was the average mean spherical equivalent (avMSE), a measure of refractive error,  
252 that was impacted the most by "wear glasses" context. Individuals who wore glasses had a much  
253 higher PGS-phenotype  $R^2$  (9.6%) than those who did not (2.2%), likely due to the reduced  
254 variation in avMSE phenotypes among individuals who did not wear glasses. Comparing across  
255 the two datasets, BMI, LDL, and cholesterol were more heavily influenced by context than  
256 average, while diastolic blood pressure and HDL were less impacted, suggesting trait-specific  
257 susceptibility to context-specific accuracy. Notably, there were also cases where context-  
258 specificity of the same trait was drastically different across datasets. For example, prediction SD  
259 differences for predicting education years was 90% in All of Us versus 8% in UK Biobank. This  
260 disparity likely reflected the more diverse distribution of education years and other social  
261 determinants of health in the US population sampled in All of Us, in line with results in Figures 2  
262 and 3. Such differences between datasets also highlight that context-specificity can be population-  
263 specific and the need to consider unique characteristics of different populations in calibration.  
264 Taken together, our findings emphasize the importance of incorporating context information into  
265 PGS-based models when applied in diverse populations.

## 266 Discussion

267 Our work adds to the literature of PGS-based prediction as follows. First, we show that context-  
268 specific accuracy of PGS is highly pervasive across traits and biobanks with socioeconomic  
269 contexts often having larger impact than genetic ancestry<sup>5,10,12,23,41</sup>. Second, we introduce CalPred  
270 to estimate context-specific prediction intervals that maintain calibration for all individuals across  
271 contexts. Third, we show using real and simulated data how differential prediction intervals can  
272 be used to incorporate uncertainty in predictions. Although we focused primarily on PGS-based  
273 prediction, our approaches are general and can incorporate any other factors. Fourth, we focused  
274 on trait prediction as the main output of our approach motivated by genomic medicine applications.  
275 As PGSs are increasingly applied to diverse populations, we find it imperative to incorporate the  
276 context-specific accuracy into PGS downstream analyses to avoid bias against certain contexts  
277 due to differential prediction accuracy, especially for contexts that are correlated with  
278 socioeconomic status. CalPred provides a principled framework to quantify  
279 generalizability/portability of a given PGS and represent individualized context-specific accuracy  
280 to be leveraged in downstream analyses. The prediction intervals can be interpreted as a  
281 personalized reference range accounting for each individual's contexts (including age, sex, and

282 genetic variation via PGS). Such personalized reference range may prove useful in identifying  
283 individuals with outlier lab values in a personalized and equitable fashion to prevent under-/over-  
284 diagnosis<sup>42</sup>.

285 The observation that distribution of PGSs differs across genetic ancestry continuum<sup>41</sup> motivates  
286 methods that regress out effects of variables representing genetic ancestry from PGS distribution  
287 to facilitate comparison across individuals locating at different positions in genetic ancestry  
288 continuum<sup>43,44</sup>. However, such approaches may unintentionally remove true biological differences  
289 of PGS distribution across genetic ancestry continuum (e.g., African Americans have reduced  
290 neutrophil count that can be explained by the large effect of a single Duffy-null SNP<sup>45</sup>) as they do  
291 not consider phenotype value distribution in calibration procedure; in addition, these approaches  
292 cannot represent different standard errors in PGS predictions of individuals across genetic  
293 ancestry continuum. Our method leverages a set of calibration data to properly adjust point  
294 predictions across contexts according to true phenotype distribution. Compared to other existing  
295 calibration methods<sup>34</sup>, our approach provides a framework to incorporate context information.

296 We note several limitations and provide future directions of our work. First, we focused on  
297 modeling and analyzing quantitative traits in this work. Context-specific accuracies can be further  
298 incorporated in modeling case-control status and absolute risk of diseases, perhaps by modeling  
299 the underlying disease liability using methods proposed in this study. Second, we made several  
300 modeling assumptions, including the linear relationship between error terms and contexts, as well  
301 as quantile normalization procedure to phenotype values to fit in normal assumption of CalPred  
302 model. Future work may leverage models with fewer assumptions and calibration dataset with  
303 larger sample size to enable more flexible modeling. Third, CalPred requires calibration data that  
304 matches in distribution with the target data, including both the distribution of contexts and their  
305 effects to phenotypes (in terms of both prediction mean and variance). Otherwise, there may be  
306 bias in target samples that are underrepresented in the calibration data. The magnitude of bias  
307 due to mismatch between calibration and target data in realistic scenarios needs to be empirically  
308 examined in future work. As shown in our simulation studies, missing contexts will also limit proper  
309 calibration of PGS along such contexts; this observation advocates standardized and  
310 comprehensive profiling of contexts across biobanks to better quantify the role of contexts to PGS  
311 accuracy, especially for those related to social-economic status, to prevent further exacerbation  
312 of health disparity. Relatedly, these results indicate that GWAS data collecting process not only  
313 needs to prioritize diversity in genetic ancestry, but also promote diversity across social-economic  
314 contexts, because PGS may be estimated with different precision in different social-economic  
315 contexts. Fourth, CalPred prediction intervals will benefit from improved modeling of the prediction  
316 mean; this may be achieved by more fine-grained modeling of prediction factors to capture more  
317 phenotype variation (Supplementary Note). For example, sex-specific SNP-level effects can be  
318 estimated from individual-level GWAS data<sup>16</sup> and CalPred coupled with sex-specific PGS is likely  
319 to produce more precise, and shorter, prediction intervals.



## Figures

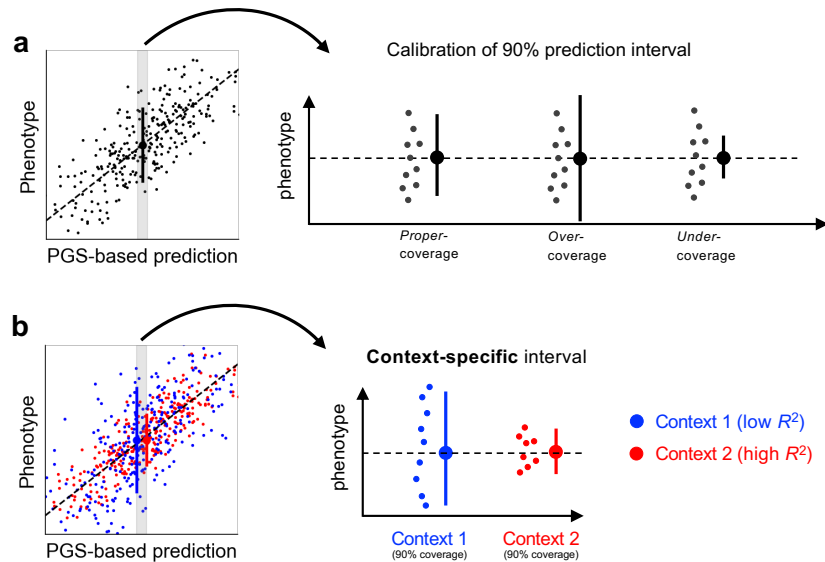

321

322

323

324

325

326

327

328

329

330

331

332

**Figure 1: Calibrated and context-specific prediction intervals via CalPred.** (a) Calibration of prediction intervals. We consider a subset of individuals with the same point prediction (shaded area in the left panel, dashed horizontal line in the right panel). Each dot denotes an individual's phenotype value. Intervals with *proper-coverage* cover the true phenotype at pre-specified probability of 90%; intervals with *over-coverage* are incorrectly wide; intervals with *under-coverage* are incorrectly narrow. (b) Context-specific calibration of prediction intervals. We consider two subpopulations in different contexts (e.g., female and male). Context 1 (blue dots) has lower prediction accuracy and therefore wider variation around the mean, while context 2 (red dots) has higher prediction accuracy and therefore narrower variation around the mean. Context-specific intervals vary by context, providing intervals with proper coverage in each context.

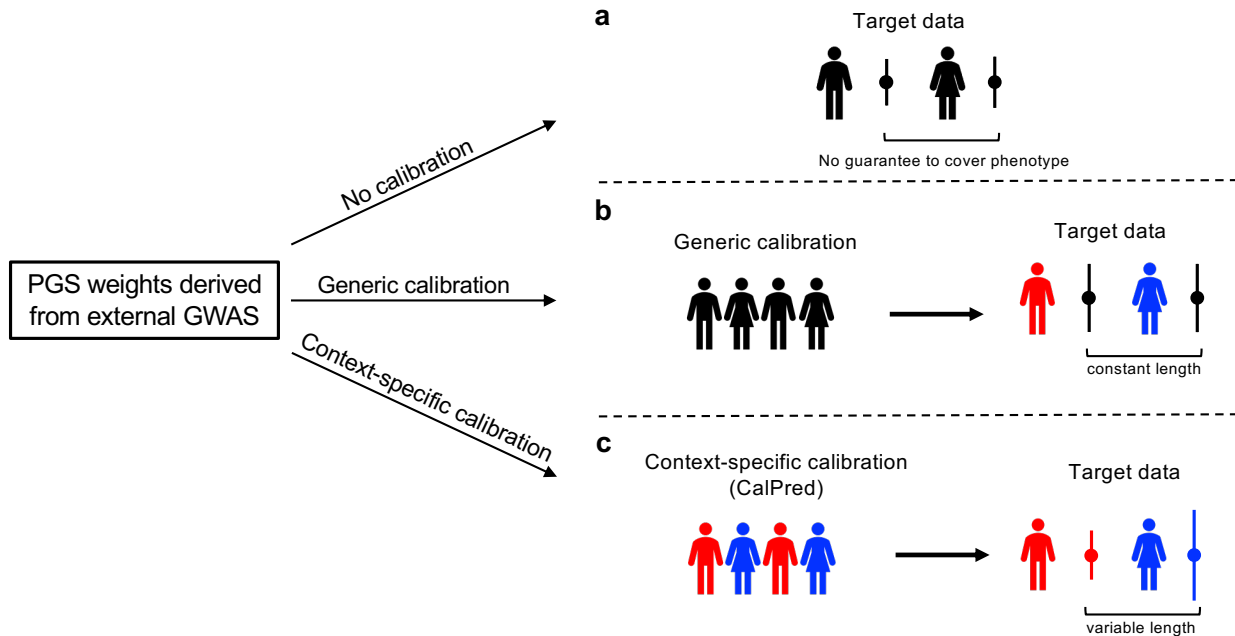

333  
 334  
 335  
 336  
 337  
 338  
 339  
 340  
 341  
 342

**Figure 2: Different approaches for prediction intervals of PGS-based models.** All approaches start with a set of predefined PGS weights derived from existing GWAS. **(a)** prediction intervals can be calculated using analytical formula without calibration data. However, these intervals are not guaranteed to be well-calibrated. **(b)** Generic calibration methods do not consider context information; they produce generic prediction intervals that are constant across individuals. **(c)** Context-specific calibration leverages a set of calibration data to estimate the impact of each context to trait prediction accuracy; the estimated impact can then be used to generate prediction intervals for any target individuals matching in distribution with calibration data.

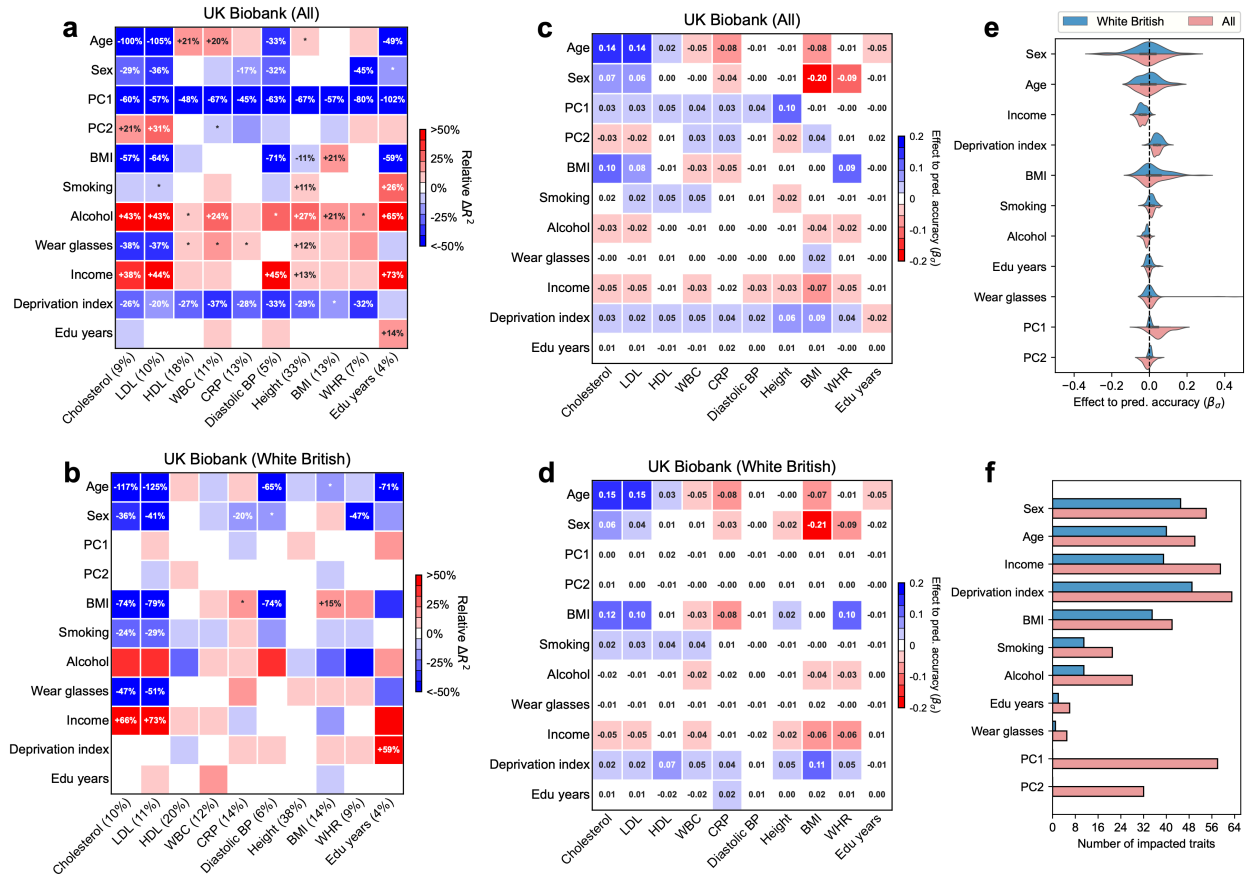

343  
344

345  
346  
347

348

349

350

351

352

353

354

355

356

357

358

359

360

**Figure 3: Widespread context-specific PGS prediction accuracy in UK Biobank.** (a-b) Heatmaps for context-specific PGS accuracy for all and WB individuals. Each row denotes a context and each column denotes a trait; the squared correlation between PGS and residual phenotype ( $R^2$ ) is shown in parentheses. Heatmap color denotes the PGS-phenotype relative  $\Delta R^2$  (defined as  $\frac{R^2_{\text{group1}} - R^2_{\text{group2}}}{R^2_{\text{all}}}$ ), where  $R^2_{\text{subset}}$  represents  $R^2$  computed in a given range of the context variable. For continuous contexts, relative  $\Delta R^2$  denote differences of top quintile minus bottom quintile; for binary contexts (including sex, smoking, wear glasses, alcohol), relative  $\Delta R^2$  denote differences of male minus female, smoking minus not smoking, wearing glasses minus not wearing glasses, drinking alcohol minus not drinking alcohol (these orders were arbitrarily chosen). Numerical values of relative  $R^2$  differences are displayed for PGS-context pairs with statistically significant differences (multiple testing correction for all  $10 \times 11$  PGS-context pairs in this figure;  $p < 0.05 / (10 \times 11)$ ). "\*" are displayed for PGS-context pairs with nominally significant differences (multiple testing correction for 11 contexts;  $p < 0.05 / 11$ ). (c-d) Heatmaps for effects to prediction accuracy in CalPred model (estimated  $\beta_\sigma$ ). Colormaps were inverted to those of (a-b) to reflect that positive  $\beta_\sigma$  corresponds to lower prediction accuracy and vice versa. (e) Distribution of estimated  $\beta_\sigma$  in the CalPred model for each context across traits. (f) Number of significantly impacted traits by each context ( $p < 0.05 / (72 \times 11)$ ).

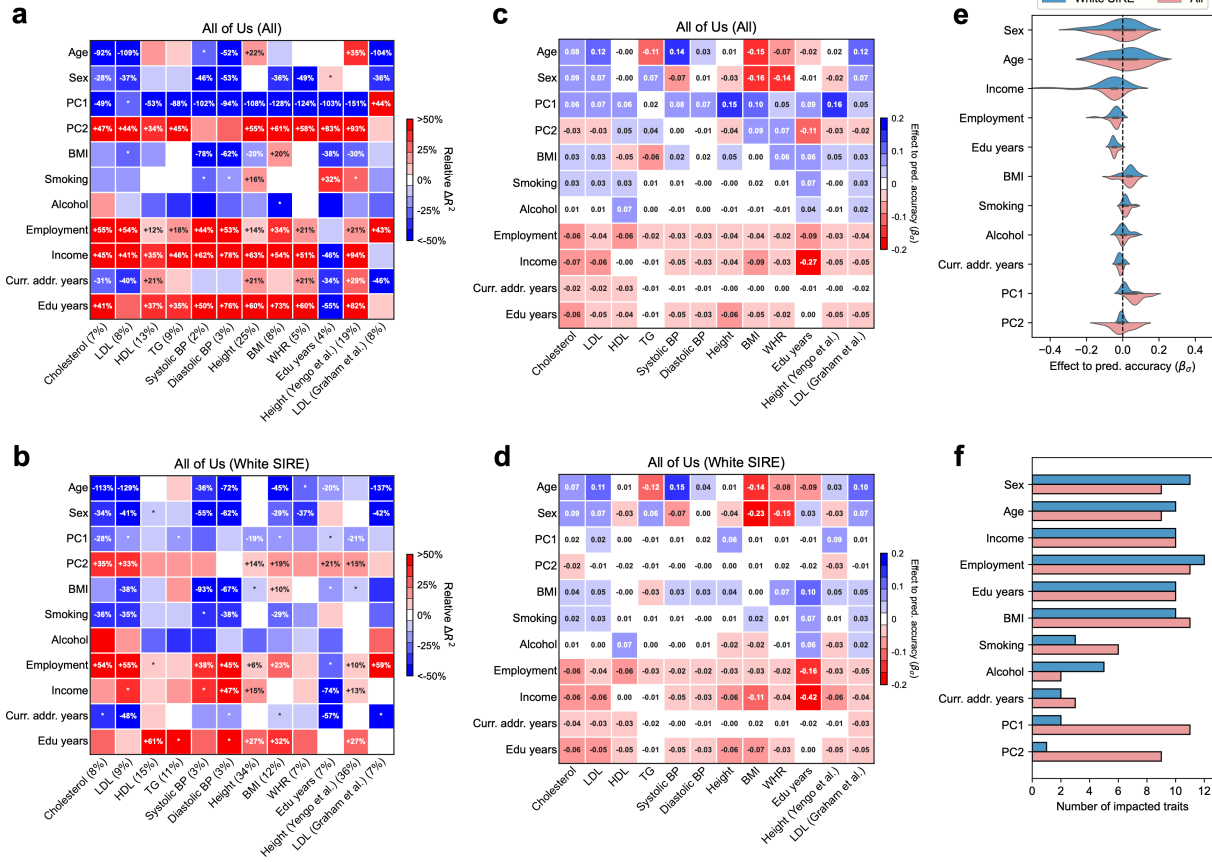

361  
362  
363  
364  
365  
366  
367  
368  
369  
370  
371  
372

**Figure 4: Widespread context-specific PGS prediction accuracy in All of Us. (a-b)** Heatmaps for context-specific PGS accuracy for all and white SIRE individuals. Each row denotes a context and each column denotes a trait; overall  $R^2$  is shown in parentheses. Heatmap color denotes relative  $\Delta R^2$ : differences of top quintile minus bottom quintile for continuous contexts and difference of male minus female for binary context of sex. Numerical values of relative  $R^2$  differences are displayed for trait-context pairs with statistically significant differences (multiple testing correction for all  $12 \times 11$  trait-context pairs in this figure;  $p < 0.05 / (12 \times 11)$ ). ‘\*’ are displayed for trait-context pairs with nominally significant differences (multiple testing correction for 11 contexts;  $p < 0.05 / 11$ ). **(c-d)** Heatmaps for estimated  $\beta_\sigma$  in CalPred model. **(e)** Distribution of estimated  $\beta_\sigma$  in CalPred model for each context across traits. **(f)** Number of significantly impacted traits by each context ( $p < 0.05 / (12 \times 11)$ ).

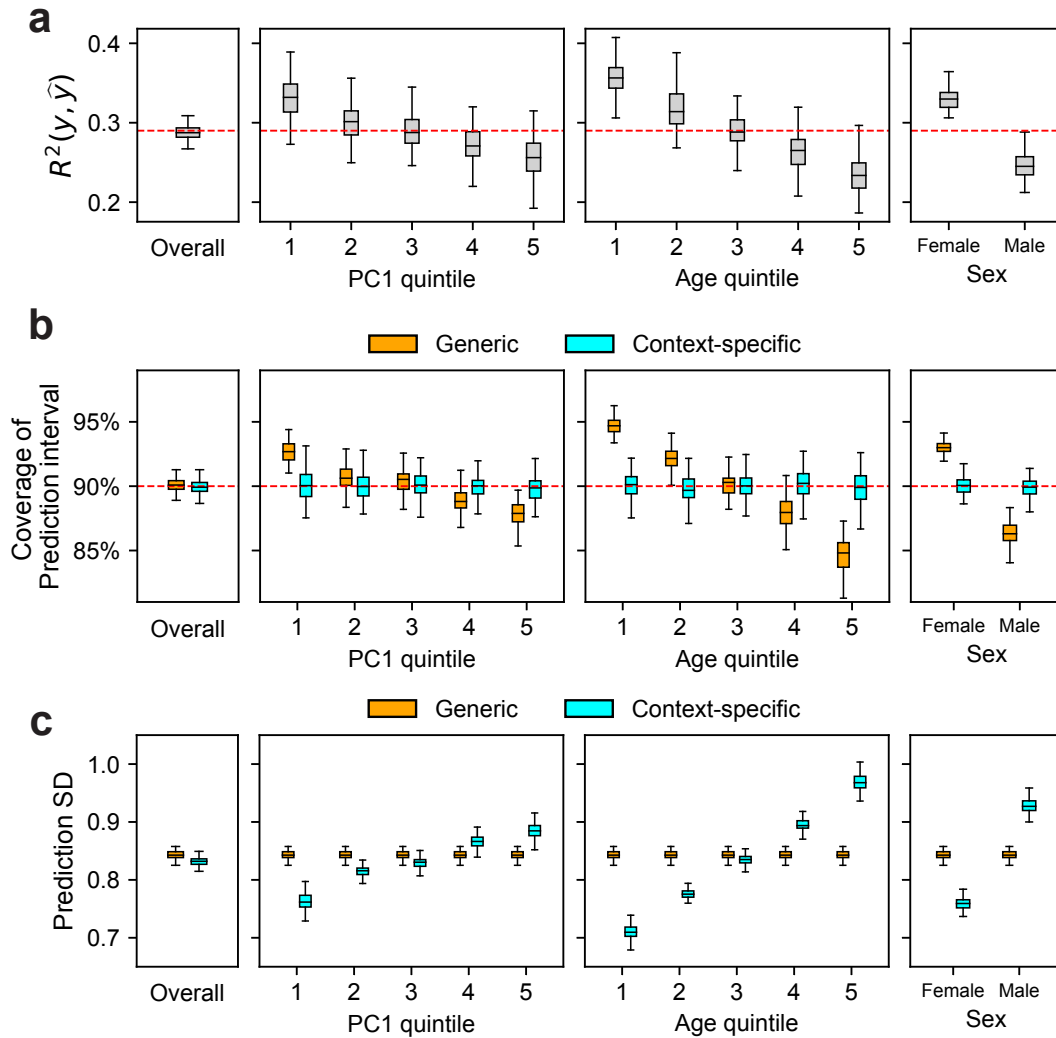

373  
374

375 **Figure 5: Simulation studies of CalPred.** Simulations were performed to reflect scenarios where  
 376 individuals have variable prediction accuracy by genetic PC1, age, and sex. For each simulation, we  
 377 first trained a calibration model using a random set of 5,000 training individuals and then evaluated  
 378 resulting prediction intervals on 5,000 target individuals (Methods). **(a)** Prediction  $R^2$  between  $y$  and  $\hat{y}$   
 379 in simulated data both at the overall level, and in each context subgroup. **(b)** Coverage of generic vs.  
 380 context-specific 90% prediction intervals evaluated in each context subgroup. Generic intervals were  
 381 obtained by applying CalPred without context information; context-specific intervals were obtained by  
 382 applying CalPred together with context information. **(c)** Average length of generic vs. context-specific  
 383 prediction standard deviation (SD) in each context. Each box plot contains  $R^2$ /coverage/average length  
 384 evaluated across 100 simulations (100 points for each box plot), the center corresponds to the median;  
 385 the box represents the first and third quartiles of the points; the whiskers represent the minimum and  
 386 maximum points located within  $1.5 \times$  interquartile range from the first and third quartiles, respectively.

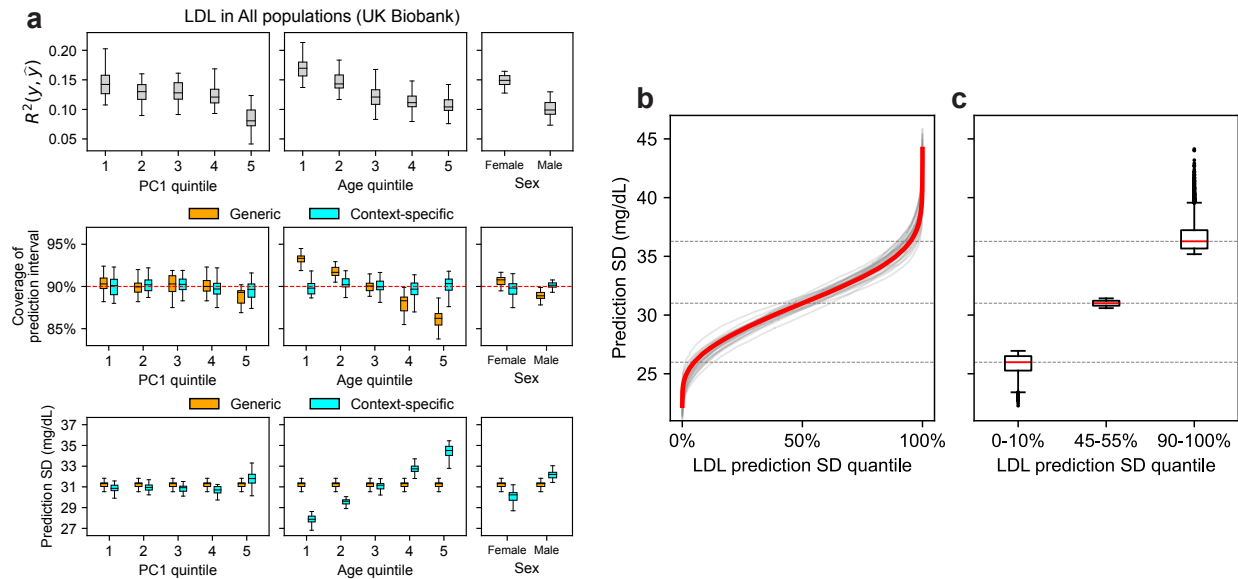

387  
 388  
 389  
 390  
 391  
 392  
 393  
 394  
 395  
 396  
 397  
 398  
 399  
 400  
 401  
 402  
 403

**Figure 6: CalPred PGS calibration of LDL in UK Biobank. (a) Top panel:** Prediction  $R^2$  between phenotype and point predictions (incorporating PGS and other covariates) both at the overall level, and in each subgroup of individuals stratified by context. **Middle panel:** Coverage of generic vs. context-specific 90% prediction intervals evaluated in each context subgroup. Generic intervals were obtained by applying CalPred without context information; context-specific intervals were obtained by applying CalPred together with context information. **Bottom panel:** Average length of generic vs. context-specific 90% prediction intervals in each context. Each box plot contains  $R^2$ /coverage/average length across 30 random samples with each sample of 5,000 training individuals and 5,000 target individuals (30 points for each box plot) **(b)** Ordered LDL prediction SD in unit of mg/dL. Gray lines denote prediction SD obtained with random sample of 5,000 training and applied to 5,000 target individuals. Red line denote prediction SD obtained from all individuals. **(c)** Box plots of results in (b) from individuals of LDL prediction SD quantile of 0-10%, 45-55%, 90-100%; the center corresponds to the median; the box represents the first and third quartiles of the points; the whiskers represent the minimum and maximum points located within 1.5x interquartile ranges from the first and third quartiles, respectively.

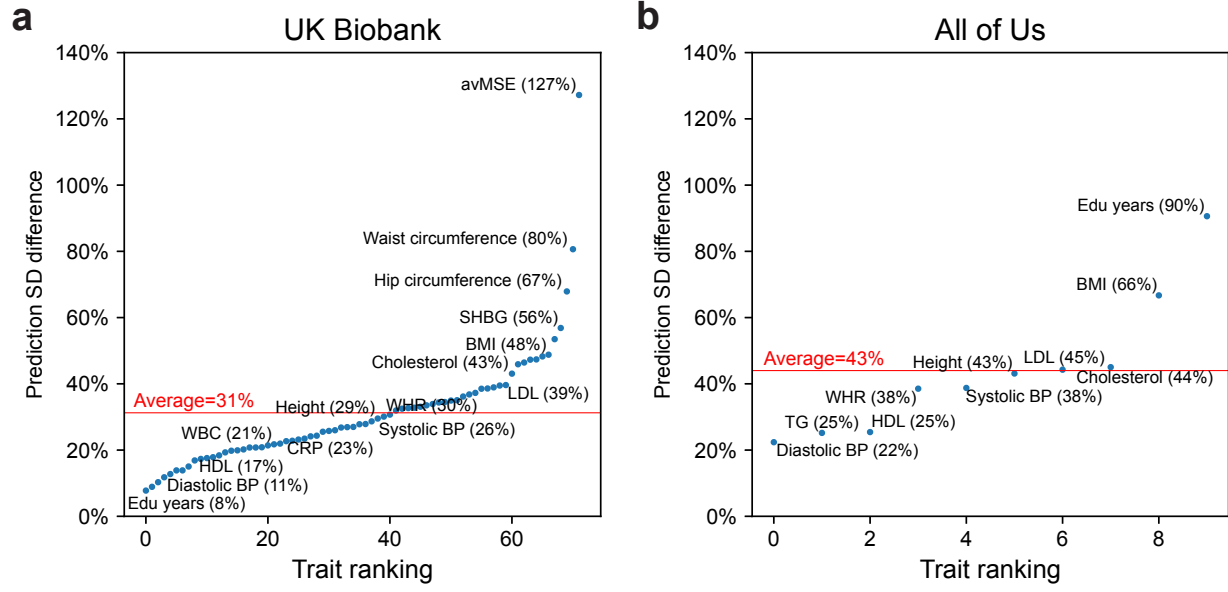

404  
405  
406  
407  
408  
409  
410

**Figure 7. Variation of prediction standard deviation (SD) accounting for all contexts.** Relative difference of prediction SD between top and bottom prediction SD deciles (90-100% vs. 0-10%) for all traits in UK Biobank (a) and All of Us (b). Traits are ranked by prediction SD. The difference is calculated with the median prediction SD within decile of individuals with highest prediction SD  $s_{d1}$  and decile of individuals with lowest prediction SD  $s_{d10}$  using  $\left(\frac{s_{d1}-s_{d10}}{s_{d10}} - 1\right) \times 100\%$ .

411

## Methods

412

### Constructing calibrated and context-specific prediction intervals

413

414

415

416

417

418

419

420

421

We first provide an overview of CalPred framework. CalPred takes as input from pre-trained PGS weights, genotype, phenotype and contexts to train a calibration model to generate calibrated and context-specific prediction intervals for target individuals. We consider a calibration dataset with  $N_{\text{cal}}$  individuals. For each individual  $i=1, \dots, N_{\text{cal}}$ , we have measured genotype vector  $\mathbf{g}_i \in \{0,1,2\}^M$  with  $M$  SNPs, and phenotype  $y_i$ . With pre-trained PGS weights for a given trait  $\boldsymbol{\beta}_g \in \mathbb{R}^M$ , we calculate the PGS for everyone in the calibration data with  $\mathbf{g}_i^\top \boldsymbol{\beta}_g$ . Each individual's PGS, together with other contexts, including age, sex, genetic ancestry and other socioeconomic factors, compose each individual  $i$ 's contexts  $\mathbf{c}_i$  (all '1' intercepts are also included). Phenotypes are then modeled as

422

$$y_i = \mathcal{N}(\mu(\mathbf{c}_i), \sigma^2(\mathbf{c}_i)), i = 1, \dots, N_{\text{cal}}$$

423

$$\mu(\mathbf{c}_i) = \mathbf{c}_i^\top \boldsymbol{\beta}_\mu, \sigma^2(\mathbf{c}_i) = \exp(\mathbf{c}_i^\top \boldsymbol{\beta}_\sigma).$$

424

There are two main components in the model

425

426

427

428

429

430

431

- $\mu(\mathbf{c}_i) = \mathbf{c}_i^\top \boldsymbol{\beta}_\mu$  models the baseline prediction mean. This term is commonly used to predict phenotypes using PGS together with other contexts.
- $\sigma^2(\mathbf{c}_i) = \exp(\mathbf{c}_i^\top \boldsymbol{\beta}_\sigma)$  models the context-specific variance of  $y$  around prediction mean. Differential prediction accuracy across contexts can lead to variable variance around prediction mean across contexts. The use of  $\exp(\cdot)$  is to ensure that the variance term  $\geq 0$ .

432

433

434

435

436

437

438

439

440

441

442

Model parameters  $\boldsymbol{\beta}_\mu, \boldsymbol{\beta}_\sigma$  can be estimated leveraging a set of calibration data using restricted maximum likelihood for linear model with heteroskedasticity<sup>46</sup> implemented in `statmod` R package<sup>47</sup>. Then individual-level predictive distribution  $\mathcal{N}(\hat{\mu}(\mathbf{c}_i) = \mathbf{c}_i^\top \hat{\boldsymbol{\beta}}_\mu, \hat{\sigma}^2(\mathbf{c}_i) = \exp(\mathbf{c}_i^\top \hat{\boldsymbol{\beta}}_\sigma))$  can be generated for any target individual  $\mathbf{c}_i$  using the fitted  $\hat{\boldsymbol{\beta}}_\mu, \hat{\boldsymbol{\beta}}_\sigma$ . The corresponding  $\alpha$ -level prediction interval (e.g.,  $\alpha=90\%$  for 90% prediction interval) is  $[\hat{\mu}(\mathbf{c}_i) - \Phi^{-1}\left(1 - \frac{\alpha}{2}\right) \hat{\sigma}(\mathbf{c}_i), \hat{\mu}(\mathbf{c}_i) + \Phi^{-1}\left(1 - \frac{\alpha}{2}\right) \hat{\sigma}(\mathbf{c}_i)]$ , where  $\Phi^{-1}$  is the inverse cumulative distribution function of a standard normal distribution (e.g.,  $\Phi^{-1}\left(1 - \frac{\alpha}{2}\right) = 1.645$  for 90% prediction interval). Since we fit a simple linear model, the extent of parameter overfitting is minimal with moderate sample size for calibration data (e.g.,  $N_{\text{cal}} > 1,000$  as validated in our simulation studies).

443

444

445

446

447

448

449

450

**Quantile normalization for non-normal phenotype distribution.** In the above, we have assumed that prediction intervals can be properly modeled as a Gaussian distribution, which may not be always valid for every phenotype. To reduce the impact of this assumption to real data analysis, we apply a transformation function  $Q(\cdot)$  to  $y$  with ranked based inverse normal transformation such that  $Q(y)$  follow a normal distribution;  $Q(y)$  can then be modeled using the methods described above. Fitted prediction intervals can then be transformed back into the original  $y$  space using  $Q^{-1}(y)$ .

451

### Quantifying context-specific $R^2$ of PGS

452

453

454

455

456

We quantify context-specific prediction accuracy ( $R^2$ ) of PGS, that is, to what extent PGS have variable prediction accuracy across contexts (including age, sex, genetic ancestry, proxies for lifestyle, socioeconomic contexts that can influence traits<sup>48</sup>). Accurate quantification of contexts contributing to variable prediction accuracy is important in constructing calibration model. In detail, for each pair of context and trait in a population, we calculated the prediction accuracy  $R^2$  between



457 PGS  $\hat{y}_i$  and covariate-regressed phenotypes  $y_i$  (phenotypes for each trait were regressed out of  
 458 age, sex, age\*sex and top 10 PCs; this adjustment is to better separate the contribution of PGS)  
 459 across each subgroup of individuals defined by contexts. We summarized results using relative  
 460 differences of  $R^2$  across context groups to baseline  $R^2$  calculated across all evaluated individuals  
 461 (relative differences between two classes for binary contexts; differences between top and bottom  
 462 quintiles for continuous contexts). We calculated the Spearman's  $R^2$  between point predictions  
 463 and covariate-regressed phenotypes  $R^2(\hat{y}, y)$  within each context subgroup. We also calculated  
 464 the baseline Spearman's  $R^2$  denoted as  $R_{\text{all}}^2$  across all individuals regardless of contexts. We  
 465 summarized the results for each pair of trait and context using the "relative  $\Delta R^2$ " defined as  
 466  $\frac{R_{\text{group1}}^2 - R_{\text{group2}}^2}{R_{\text{all}}^2}$ . We assessed statistical significance of  $\Delta R^2$  across context subgroups by testing  
 467 the null hypothesis  $H_0: \Delta R^2 = 0$  using 1,000 bootstrap samples of  $\Delta R^2$  (in each bootstrap sample,  
 468 the whole dataset was resampled with replacement and  $\Delta R^2$  were then re-evaluated). Statistical  
 469 significance was assessed using two-sided  $p$ -values comparing the observed  $\Delta R^2$  to the bootstrap  
 470 samples of  $\Delta R^2$ .

471  
 472 **Relationship between CalPred model and  $R^2$ .** Population-level metrics such as  $R^2$  can be  
 473 derived from this model as a function of  $\beta_\sigma$  and distribution of  $c_i$ . Suppose  $y = \hat{y} + e, e \sim$   
 474  $\mathcal{N}(0, \exp(\mathbf{c}^\top \beta_\sigma))$ , where  $y, \hat{y}, e$  denote the phenotypes, point predictions and residual noises,  
 475 respectively. We have

$$476 \quad R^2(y, \hat{y}) = R^2(\hat{y} + e, \hat{y}) = \frac{\text{Var}[\hat{y}]}{\text{Var}[\hat{y}] + \text{Var}[e]}$$

477 Holding  $\text{Var}[\hat{y}]$  as fixed,  $R^2(y, \hat{y})$  is a function of  $\text{Var}[e]$ , which is determined by the distribution of  
 478  $\mathbf{c}$  and values of  $\beta_\sigma$ . This indicates a correspondence between  $\beta_\sigma$  and  $R^2(y, \hat{y})$ . Therefore,  
 479 estimated  $\beta_\sigma$  can also be used as a metric to quantify context-specific accuracy (as used in Figure  
 480 3-4). While relative  $\Delta R^2$  is easier to interpret, it assesses the marginal contribution of each context  
 481 separately and require binning for continuous contexts. Meanwhile,  $\beta_\sigma$  in CalPred model jointly  
 482 account for all contexts in parametric regression, and therefore can quantify the unique  
 483 distribution of each context to variable accuracy.

484  
 485 On the other hand, even with constant prediction interval length (constant  $\text{Var}[e]$ ), variable  $R^2$  can  
 486 still result from variable  $\text{Var}[\hat{y}]$  across context subgroups. While CalPred focus on modeling  
 487  $\text{Var}[e]$  as a function of contexts to represent variable  $R^2$ ,  $\text{Var}[\hat{y}]$  can also change as a function of  
 488 contexts in certain scenarios. For example,  $\text{Var}[\hat{y}]$  can vary with contexts if  $\hat{y} = \text{PGS} \times \beta_{\text{slope}}$  and  
 489 the slope  $\beta$  varies as a function of context. For example, ref.<sup>16</sup> has reported  $\beta_{\text{slope}}$  can be different  
 490 across contexts. Such variable slope term can be handled by modeling variable slope terms in  
 491 prediction mean  $\hat{y}$  (Supplementary Note).

## 492 493 **Real data analysis**

494 We analyzed a diverse set of contexts and traits in UK Biobank and All of Us (1) to quantify the  
 495 extent of context-specific prediction accuracy and (2) to evaluate context-specific prediction  
 496 intervals via CalPred.

497  
 498 **Training polygenic score weights.** Polygenic scores were trained on 370K individuals in UK  
 499 Biobank that were assigned to "white British" cluster and 1.1M HapMap3 SNPs. For each trait,  
 500 we performed GWAS using `plink2 --glm` with age, sex and top 16 PCs as covariates. Then  
 501 we estimated PGS weights using `snp_ldpred2_auto` in LDpred2<sup>49</sup> with input of GWAS  
 502 summary statistics and in-sample LD matrix. These estimated PGS weights were then applied to  
 503 target individuals in both UK Biobank and All of Us to obtain individual-level PGS. To train

504 polygenic score weights to be used for individuals from All of Us, we overlapped 1.2M SNPs in  
505 All of Us quality-controlled microarray data to 12M SNPs in UK Biobank imputed data to obtain a  
506 set of 0.8M SNPs present in both datasets. Then we trained and applied polygenic scoring weights  
507 using these shared SNPs in UK Biobank to All of Us individuals. This procedure helps improve  
508 accuracy of the polygenic score in All of Us by ensuring all SNPs that have non-zero weights to  
509 present in the data.

510

511 **UK Biobank dataset.** We analyzed 490K genotyped individuals (including both training and  
512 target individuals). We used 1.1M HapMap3<sup>50</sup> SNPs in all analyses. All UK Biobank individuals  
513 are clustered into sub-continental ancestry clusters based on top 16 pre-computed PCs (data-  
514 field 22009 in ref.<sup>28</sup> as in ref.<sup>6</sup>). This procedure assigned 410K individuals into “white British”  
515 cluster. A random subset of 370K “white British” individuals to perform GWAS and estimate PGS  
516 weights (see above); we trained PGS weights starting with individual-level data to avoid overlap  
517 of sample between training and target data. For evaluation, we used the rest of 120K individuals  
518 with genotypes, phenotypes and contexts (including individuals from both ~40K “White British”  
519 individuals and ~80K other individuals). We focused on analyzing 72 traits with  $R^2 > 0.05$  in 40K  
520 WB target individuals and/or biological importance). We followed [https://github.com/privetfl/UKBB-  
521 PGS/blob/main/code/prepare-pheno-fields.R](https://github.com/privetfl/UKBB-PGS/blob/main/code/prepare-pheno-fields.R) and ref.<sup>6</sup> to perform basic preprocessing for trait  
522 values (e.g., log-transformation and clipping of extreme values). For each trait, we quantile  
523 normalized phenotype values; when performing calibration, phenotype quantiles were calculated  
524 based on calibration data and were then used to normalize target data. We analyzed 11 contexts  
525 representing a broad set of socioeconomic and genetic ancestry contexts, including binary  
526 contexts (sex, ever smoked, wear glasses, drinking alcohol) and continuous contexts (top two  
527 PCs, age, BMI, income, deprivation index, and education years). We note that income and  
528 education years have been processed into 5 quintiles in the original data of UK Biobank.

529

530 **All of Us dataset.** We analyzed 165K genotyped individuals with diverse genetic ancestry  
531 contexts (microarray data in release v6). We retained 1.2M SNPs from microarray data after basic  
532 quality control using plink2 with `plink2 --geno 0.05 --chr 1-22 --max-alleles 2 -  
533 -rm-dup exclude-all --maf 0.001`. We used microarray data because it contains more  
534 individuals and can be analyzed with low computational cost. All individuals with microarray data  
535 were used in the evaluation. We analyzed 10 heritable traits, including height, BMI, WHR, diastolic  
536 blood pressure, systolic blood pressure, education years, LDL, cholesterol, HDL, triglyceride; they  
537 are straightforward to phenotype and have large sample sizes. Physical measurement  
538 phenotypes were extracted from Participant Provided Information. Lipid phenotypes (including  
539 LDL, HDL, TC, TG) were extracted following [https://github.com/all-of-us/ukb-cross-analysis-  
540 demo-project/tree/main/ao\\_u\\_workbench\\_siloed\\_analyses](https://github.com/all-of-us/ukb-cross-analysis-demo-project/tree/main/ao_u_workbench_siloed_analyses), including procedures of extracting  
541 most recent measurements per person, and correcting for statin usage. For each trait, we quantile  
542 normalized phenotype values; when performing calibration, phenotype quantiles were calculated  
543 based on calibration data and were then used to normalize target data. We included age, sex,  
544 age\*sex, and top 10 in-sample principal components as covariates in the model. We also quantile  
545 normalized each covariate and used the average of each covariate to impute missing values in  
546 covariates. We analyzed 11 contexts, including binary contexts (sex) and continuous contexts  
547 (top two PCs, age, BMI, smoking, alcohol, employment, education, income, number of years living  
548 in current address).

549

550 **Population descriptor usage.** We explain our usage choices of population descriptor, including  
551 the use of top two PCs to capture genetic ancestry/similarity and the use of “white British” in  
552 analyses of UK Biobank and “white SIRE” in analyses of All of Us. We use the top two PCs  
553 computed across all individuals in UK Biobank or in All of Us, respectively, to capture the  
554 continuous genetic ancestry variation in each dataset. While these two PCs provide major axes

555 of genetic variation (Figure S3), we acknowledge that top two PCs alone are not sufficient to fully  
 556 capture all variation in the entire population. The discretized PC1 and PC2 subgroups used in  
 557 Figure 2-6 is to enable calculation of population-level statistics such as  $R^2$  while we acknowledge  
 558 that the underlying genetic variation is continuous. In UK Biobank, we intended to analyze a set  
 559 of individuals with relatively similar genetic ancestry to perform GWAS and derive PGS. We used  
 560 a set of individuals previously annotated with “white British” that were identified using a  
 561 combination of self-reported ethnic background and genetic information having very similar  
 562 ancestral backgrounds based on results of the PCA<sup>28</sup>. In All of Us, we selected a set of individuals  
 563 with self-reported race/ethnicity (SIRE) being “white”, to study how PGS have different accuracy  
 564 across environmental contexts in such a sample defined by SIRE. Noting that SIRE is not  
 565 equivalent to genetic ancestry, the contrast of results from UK Biobank and All of Us helps  
 566 understand how the genetic, nongenetic factors impact PGS accuracy in a group of individuals  
 567 defined by SIRE or genetic ancestry.

568  
 569 **Evaluating context-specific prediction intervals.** Recall that the prediction mean and standard  
 570 deviation are  $\hat{\mu}(\mathbf{c}), \hat{\sigma}(\mathbf{c})$  for a target individual with contexts  $\mathbf{c}$ . We evaluate the prediction intervals  
 571 with regard to phenotypes  $y$  using metrics of

- 572 • Prediction accuracy:  $R^2(\hat{\mu}(\mathbf{c}), y)$ .
- 573 • coverage of prediction intervals: evaluating  
 574  $\Pr \left\{ y \in \left[ \hat{\mu}(\mathbf{c}_i) - \Phi^{-1} \left( 1 - \frac{\alpha}{2} \right) \hat{\sigma}(\mathbf{c}_i), \hat{\mu}(\mathbf{c}_i) + \Phi^{-1} \left( 1 - \frac{\alpha}{2} \right) \hat{\sigma}(\mathbf{c}_i) \right] \right\} \approx \alpha$ , i.e., whether prediction  
 575 intervals cover the true phenotypes with pre-specified probability of  $\alpha$ .

576 Both metrics are evaluated both at the overall level for all individuals, and for each subgroup of  
 577 individuals defined by contexts.

578  
 579 We generated and evaluated context-specific intervals in both UK Biobank and All of Us. For both  
 580 datasets, we fit a model to simultaneously model the mean and variance where the mean term  
 581 includes PGS, age, sex, age\*sex, top 10 PCs so that this matches the baseline model that are  
 582 commonly fitted, and the variance term includes age, sex, top 2 PCs, and other contexts of interest  
 583 for each dataset (as shown in Figure 3-4 for UK Biobank and All of Us). For each trait, we  
 584 performed the evaluation by repeatedly randomly sampling 5,000 individuals as calibration data  
 585 to perform the calibration, and 5,000 individuals as target data to perform the evaluation (as  
 586 described in “Constructing calibrated and context-specific intervals”).

### 588 Simulations assessing coverage of context-specific prediction intervals

589 We simulated PGS point predictions  $\hat{y}$  and phenotype values  $y$  to simulate traits with variable  
 590 prediction accuracy across genetic ancestry continuum, age, and sex. We started with real  
 591 contexts from 76K UK Biobank individuals not used for PGS training (see section “Real data  
 592 analyses”). We used 3 contexts (PC1, age, and sex) in simulations. We quantile normalized each  
 593 context so they had mean 0 and variance 1. Such simulations preserved the correlation between  
 594 contexts. Given these processed contexts, we simulated point predictions  $\hat{y}$  using a normal  
 595 distribution  $\hat{y} \sim \mathcal{N}(0,1)$ , and we simulated phenotypes  $y$  with:

$$596 \quad y \sim \mathcal{N}(\hat{y}, \exp \left( \beta_{\sigma,0} + \sum_c \beta_{\sigma,c} \times c \right)),$$

597 where  $\beta_{\sigma,0}$  denoted the baseline variance of  $y$ , and  $\beta_{\sigma,c}$  was the effect of context  $c$  to the variance  
 598 of  $y$ . “ $\Sigma_c$ ” enumerated over PC1, age, sex. This procedure simulated different variance of  $y$  around  
 599  $\hat{y}$  for individuals with different contexts, as observed in real data.

600  
 601 In details, we first selected  $\beta_{\sigma,0}$  such that  $R^2(y, \hat{y}) = 30\%$  for individuals with average contexts  
 602 (such that  $\sum_c \beta_{\sigma,c} \times c = 0$ ). We simulated data with variable variances: we set  $\beta_{\sigma,age} =$

603 0.25,  $\beta_{\sigma,sex} = 0.2$ ,  $\beta_{\sigma,PC1} = 0.15$ . These parameters were manually chosen to roughly reflect the  
604 observed variable  $R^2$  in real data. In each simulation, we randomly sampled  $N_{cal}=100, 500, 2500,$   
605 5000 individuals used for estimating the calibration model and  $N_{test} = 5000$  individuals for  
606 evaluating the predictions from the set of 76K individuals. New point predictions and phenotypes  
607  $\hat{y}, y$  were simulated in each simulation. Then we quantified the prediction accuracy and coverage  
608 of prediction intervals in these simulations.

## 609 **Data availability**

610 UK Biobank individual-level genotype and phenotype data are available through application at  
611 <http://www.ukbiobank.ac.uk>. AoU individual-level genotype and phenotype are available through  
612 application at <https://www.researchallofus.org>.

613

## 614 **Code availability**

615 Software implementing CalPred and code for replicating analyses:  
616 <https://github.com/kangchenghou/CalPred>.

617

## 618 **Acknowledgements**

619 We thank Molly Przeworski for helpful suggestions. This research was funded in part by the  
620 National Institutes of Health under awards R01HG009120, R01MH115676, and U01HG011715.  
621 This research was conducted using the UK Biobank Resource under applications 33127. We  
622 thank the participants of UK Biobank for making this work possible. The *All of Us* Research  
623 Program is supported by the National Institutes of Health, Office of the Director: Regional Medical  
624 Centers: 1 OT2 OD026549; 1 OT2 OD026554; 1 OT2 OD026557; 1 OT2 OD026556; 1 OT2  
625 OD026550; 1 OT2 OD 026552; 1 OT2 OD026553; 1 OT2 OD026548; 1 OT2 OD026551; 1 OT2  
626 OD026555; IAA #: AOD 16037; Federally Qualified Health Centers: HHSN 263201600085U; Data  
627 and Research Center: 5 U2C OD023196; Biobank: 1 U24 OD023121; The Participant Center:  
628 U24 OD023176; Participant Technology Systems Center: 1 U24 OD023163; Communications  
629 and Engagement: 3 OT2 OD023205; 3 OT2 OD023206; and Community Partners: 1 OT2  
630 OD025277; 3 OT2 OD025315; 1 OT2 OD025337; 1 OT2 OD025276. In addition, the *All of Us*  
631 Research Program would not be possible without the partnership of its participants.

632  
633  
634  
635  
636  
637  
638  
639  
640  
641  
642  
643  
644  
645  
646  
647  
648  
649  
650  
651  
652  
653  
654  
655  
656  
657  
658

## References

1. Chatterjee, N., Shi, J. & García-Closas, M. Developing and evaluating polygenic risk prediction models for stratified disease prevention. *Nat. Rev. Genet.* **17**, 392–406 (2016).
2. Torkamani, A., Wineinger, N. E. & Topol, E. J. The personal and clinical utility of polygenic risk scores. *Nat. Rev. Genet.* **19**, 581–590 (2018).
3. Li, R., Chen, Y., Ritchie, M. D. & Moore, J. H. Electronic health records and polygenic risk scores for predicting disease risk. *Nat. Rev. Genet.* **21**, 493–502 (2020).
4. Kullo, I. J. *et al.* Polygenic scores in biomedical research. *Nat. Rev. Genet.* **23**, 524–532 (2022).
5. Martin, A. R. *et al.* Clinical use of current polygenic risk scores may exacerbate health disparities. *Nat. Genet.* **51**, 584–591 (2019).
6. Privé, F. *et al.* Portability of 245 polygenic scores when derived from the UK Biobank and applied to 9 ancestry groups from the same cohort. *Am. J. Hum. Genet.* **109**, 373 (2022).
7. Weissbrod, O. *et al.* Leveraging fine-mapping and multipopulation training data to improve cross-population polygenic risk scores. *Nat. Genet.* **54**, 450–458 (2022).
8. Ruan, Y. *et al.* Improving polygenic prediction in ancestrally diverse populations. *Nat. Genet.* **54**, 573–580 (2022).
9. Bitarello, B. D. & Mathieson, I. Polygenic Scores for Height in Admixed Populations. *G3* **10**, 4027–4036 (2020).
10. Mostafavi, H. *et al.* Variable prediction accuracy of polygenic scores within an ancestry group. *Elife* **9**, (2020).
11. Jiang, X., Holmes, C. & McVean, G. The impact of age on genetic risk for common diseases. *PLoS Genet.* **17**, e1009723 (2021).
12. Hui, D. *et al.* Quantifying factors that affect polygenic risk score performance across diverse ancestries and age groups for body mass index. *Pac. Symp. Biocomput.* **28**, 437–448 (2023).
13. Ding, Y. *et al.* Large uncertainty in individual polygenic risk score estimation impacts PRS-based risk stratification. *Nat. Genet.* **54**, 30–39 (2022).

- 659 14. Wray, N. R. *et al.* Pitfalls of predicting complex traits from SNPs. *Nat. Rev. Genet.* **14**, 507–515  
660 (2013).
- 661 15. Ge, T., Chen, C.-Y., Neale, B. M., Sabuncu, M. R. & Smoller, J. W. Phenome-wide heritability  
662 analysis of the UK Biobank. *PLoS Genet.* **13**, e1006711 (2017).
- 663 16. Zhu, C. *et al.* Amplification is the primary mode of gene-by-sex interaction in complex human  
664 traits. *Cell Genom.* **3**, 100297 (2023).
- 665 17. Brown, B. C., Ye, C. J., Price, A. L. & Zaitlen, N. Transethnic genetic-correlation estimates from  
666 summary statistics. *Am. J. Hum. Genet.* **99**, 76–88 (2016).
- 667 18. Shi, H. *et al.* Population-specific causal disease effect sizes in functionally important regions  
668 impacted by selection. *Nat. Commun.* **12**, 1098 (2021).
- 669 19. Patel, R. A. *et al.* Genetic interactions drive heterogeneity in causal variant effect sizes for gene  
670 expression and complex traits. *Am. J. Hum. Genet.* **109**, 1286–1297 (2022).
- 671 20. Weine, E., Smith, S. P., Knowlton, R. K. & Harpak, A. Tradeoffs in modeling context  
672 dependency in complex trait genetics. *bioRxiv* 2023.06.21.545998 (2023)  
673 doi:10.1101/2023.06.21.545998.
- 674 21. Wang, Y. *et al.* Theoretical and empirical quantification of the accuracy of polygenic scores in  
675 ancestry divergent populations. *Nat. Commun.* **11**, 3865 (2020).
- 676 22. Lambert, S. A., Abraham, G. & Inouye, M. Towards clinical utility of polygenic risk scores. *Hum.*  
677 *Mol. Genet.* **28**, R133–R142 (2019).
- 678 23. Ding, Y. *et al.* Polygenic scoring accuracy varies across the genetic ancestry continuum in all  
679 human populations. *bioRxiv* 2022.09.28.509988 (2022) doi:10.1101/2022.09.28.509988.
- 680 24. Johnson, R. *et al.* Leveraging genomic diversity for discovery in an electronic health record  
681 linked biobank: the UCLA ATLAS Community Health Initiative. *Genome Med.* **14**, 104 (2022).
- 682 25. Wiley, L. K. *et al.* Building a vertically-integrated genomic learning health system: The Colorado  
683 Center for Personalized Medicine Biobank. *bioRxiv* (2022) doi:10.1101/2022.06.09.22276222.
- 684 26. Belbin, G. M. *et al.* Toward a fine-scale population health monitoring system. *Cell* **184**, 2068-  
685 2083.e11 (2021).

- 686 27. Abul-Husn, N. S. & Kenny, E. E. Personalized medicine and the power of electronic health  
687 records. *Cell* **177**, 58–69 (2019).
- 688 28. Bycroft, C. *et al.* The UK Biobank resource with deep phenotyping and genomic data. *Nature*  
689 **562**, 203–209 (2018).
- 690 29. Ramirez, A. H. *et al.* The All of Us Research Program: Data quality, utility, and diversity.  
691 *Patterns (N Y)* **3**, 100570 (2022).
- 692 30. Wand, H. *et al.* Improving reporting standards for polygenic scores in risk prediction studies.  
693 *Nature* **591**, 211–219 (2021).
- 694 31. Wei, J. *et al.* Calibration of polygenic risk scores is required prior to clinical implementation:  
695 results of three common cancers in UKB. *J. Med. Genet.* **59**, 243–247 (2022).
- 696 32. van Houwelingen, H. C. Validation, calibration, revision and combination of prognostic survival  
697 models. *Stat. Med.* **19**, 3401–3415 (2000).
- 698 33. Van Calster, B. *et al.* Calibration: the Achilles heel of predictive analytics. *BMC Med.* **17**, 230  
699 (2019).
- 700 34. Sun, J. *et al.* Translating polygenic risk scores for clinical use by estimating the confidence  
701 bounds of risk prediction. *Nat. Commun.* **12**, 5276 (2021).
- 702 35. Schoeler, T. *et al.* Participation bias in the UK Biobank distorts genetic associations and  
703 downstream analyses. *Nat. Hum. Behav.* (2023) doi:10.1038/s41562-023-01579-9.
- 704 36. Selzam, S. *et al.* Comparing within- and between-family polygenic score prediction. *Am. J. Hum.*  
705 *Genet.* **105**, 351–363 (2019).
- 706 37. Okbay, A. *et al.* Polygenic prediction of educational attainment within and between families from  
707 genome-wide association analyses in 3 million individuals. *Nat. Genet.* **54**, 437–449 (2022).
- 708 38. Yengo, L. *et al.* A saturated map of common genetic variants associated with human height.  
709 *Nature* **610**, 704–712 (2022).
- 710 39. Graham, S. E. *et al.* The power of genetic diversity in genome-wide association studies of lipids.  
711 *Nature* **600**, 675–679 (2021).

- 712 40. Lambert, S. A. *et al.* The Polygenic Score Catalog as an open database for reproducibility and  
713 systematic evaluation. *Nat. Genet.* **53**, 420–425 (2021).
- 714 41. Martin, A. R. *et al.* Human demographic history impacts genetic risk prediction across diverse  
715 populations. *Am. J. Hum. Genet.* **107**, 788–789 (2020).
- 716 42. Van Driest, S. L. *et al.* Association between a common, benign genotype and unnecessary bone  
717 marrow biopsies among African American patients. *JAMA Intern. Med.* **181**, 1100–1105 (2021).
- 718 43. Hao, L. *et al.* Development of a clinical polygenic risk score assay and reporting workflow. *Nat.*  
719 *Med.* **28**, 1006–1013 (2022).
- 720 44. Khera, A. V. *et al.* Whole-genome sequencing to characterize monogenic and polygenic  
721 contributions in patients hospitalized with early-onset myocardial infarction. *Circulation* **139**,  
722 1593–1602 (2019).
- 723 45. Reich, D. *et al.* Reduced neutrophil count in people of African descent is due to a regulatory  
724 variant in the Duffy antigen receptor for chemokines gene. *PLoS Genet.* **5**, e1000360 (2009).
- 725 46. Smyth, G. K. An Efficient Algorithm for REML in Heteroscedastic Regression. *J. Comput.*  
726 *Graph. Stat.* **11**, 836–847 (2002).
- 727 47. Giner, G. & Smyth, G. K. statmod: Probability Calculations for the Inverse Gaussian Distribution.  
728 *arXiv [stat.CO]* (2016).
- 729 48. Yousefi, P. D. *et al.* DNA methylation-based predictors of health: applications and statistical  
730 considerations. *Nat. Rev. Genet.* **23**, 369–383 (2022).
- 731 49. Privé, F., Arbel, J. & Vilhjálmsson, B. J. LDpred2: better, faster, stronger. *Bioinformatics* **36**,  
732 5424–5431 (2020).
- 733 50. The International HapMap 3 Consortium. Integrating common and rare genetic variation in  
734 diverse human populations. *Nature* **467**, 52–58 (2010).
